# Supplementary material for: Comparison of rhesus and cynomolgus macaques as an infection model for COVID-19
Source: PubMed Central journal article supplement (PMC7904795; doi:10.1038/s41467-021-21389-9), 2021-02-24
Supplement: 41467_2021_21389_MOESM3_ESM.pdf [file 41467_2021_21389_MOESM3_ESM.pdf]

## Reporting Summary

Nature Research wishes to improve the reproducibility of the work that we publish. This form provides structure for consistency and transparency in reporting. For further information on Nature Research policies, see our [Editorial Policies](#) and the [Editorial Policy Checklist](#).

### Statistics

For all statistical analyses, confirm that the following items are present in the figure legend, table legend, main text, or Methods section.

n/a Confirmed

- The exact sample size ( $n$ ) for each experimental group/condition, given as a discrete number and unit of measurement
- A statement on whether measurements were taken from distinct samples or whether the same sample was measured repeatedly
- The statistical test(s) used AND whether they are one- or two-sided  
*Only common tests should be described solely by name; describe more complex techniques in the Methods section.*
- A description of all covariates tested
- A description of any assumptions or corrections, such as tests of normality and adjustment for multiple comparisons
- A full description of the statistical parameters including central tendency (e.g. means) or other basic estimates (e.g. regression coefficient) AND variation (e.g. standard deviation) or associated estimates of uncertainty (e.g. confidence intervals)
- For null hypothesis testing, the test statistic (e.g.  $F$ ,  $t$ ,  $r$ ) with confidence intervals, effect sizes, degrees of freedom and  $P$  value noted  
*Give  $P$  values as exact values whenever suitable.*
- For Bayesian analysis, information on the choice of priors and Markov chain Monte Carlo settings
- For hierarchical and complex designs, identification of the appropriate level for tests and full reporting of outcomes
- Estimates of effect sizes (e.g. Cohen's  $d$ , Pearson's  $r$ ), indicating how they were calculated

*Our web collection on [statistics for biologists](#) contains articles on many of the points above.*

### Software and code

Policy information about [availability of computer code](#)

Data collection

Data analysis

For manuscripts utilizing custom algorithms or software that are central to the research but not yet described in published literature, software must be made available to editors and reviewers. We strongly encourage code deposition in a community repository (e.g. GitHub). See the Nature Research [guidelines for submitting code & software](#) for further information.

### Data

Policy information about [availability of data](#)

All manuscripts must include a [data availability statement](#). This statement should provide the following information, where applicable:

- Accession codes, unique identifiers, or web links for publicly available datasets
- A list of figures that have associated raw data
- A description of any restrictions on data availability

All data and materials used in the analysis are presented in the main text and supplementary figures. Accession number PRJNA681111 is available at <https://www.ncbi.nlm.nih.gov/bioproject/PRJNA681111>

## Field-specific reporting

Please select the one below that is the best fit for your research. If you are not sure, read the appropriate sections before making your selection.

- Life sciences       Behavioural & social sciences       Ecological, evolutionary & environmental sciences

For a reference copy of the document with all sections, see [nature.com/documents/nr-reporting-summary-flat.pdf](https://www.nature.com/documents/nr-reporting-summary-flat.pdf)

## Life sciences study design

All studies must disclose on these points even when the disclosure is negative.

|                 |                                                                                                                                                                                                                                                                                                                                                                                                          |
|-----------------|----------------------------------------------------------------------------------------------------------------------------------------------------------------------------------------------------------------------------------------------------------------------------------------------------------------------------------------------------------------------------------------------------------|
| Sample size     | No sample size calculation was performed. As this was an initial pilot experiment into SARS-CoV-2 in rhesus and cynomolgus macaques, 6 animals per species were selected. As per several other published early reports, minimal numbers of animals were used for sequential culls. We believe this provides important information regarding the rhesus and cynomolgus model of SARS-CoV-2 going forward. |
| Data exclusions | No data were excluded from the analysis                                                                                                                                                                                                                                                                                                                                                                  |
| Replication     | Animal experiments were not replicated due to ethical considerations when using animal models. Samples for RT-qPCR and sgPCR were assayed in duplicate against a standard curve in triplicate. All replication attempts were successful.                                                                                                                                                                 |
| Randomization   | Animals were randomly allocated to groups according to social compatibility.                                                                                                                                                                                                                                                                                                                             |
| Blinding        | Blinding was used in histopathological analysis. Numbers were randomly allocated to slides. Examination was carried out blinded and at random by independent pathologists. All the samples taken in life and at post-mortem were coded and blinded to the the investigators.                                                                                                                             |

## Reporting for specific materials, systems and methods

We require information from authors about some types of materials, experimental systems and methods used in many studies. Here, indicate whether each material, system or method listed is relevant to your study. If you are not sure if a list item applies to your research, read the appropriate section before selecting a response.

### Materials & experimental systems

| n/a                                 | Involved in the study                                           |
|-------------------------------------|-----------------------------------------------------------------|
| <input type="checkbox"/>            | <input checked="" type="checkbox"/> Antibodies                  |
| <input type="checkbox"/>            | <input checked="" type="checkbox"/> Eukaryotic cell lines       |
| <input checked="" type="checkbox"/> | <input type="checkbox"/> Palaeontology and archaeology          |
| <input type="checkbox"/>            | <input checked="" type="checkbox"/> Animals and other organisms |
| <input checked="" type="checkbox"/> | <input type="checkbox"/> Human research participants            |
| <input checked="" type="checkbox"/> | <input type="checkbox"/> Clinical data                          |
| <input checked="" type="checkbox"/> | <input type="checkbox"/> Dual use research of concern           |

### Methods

| n/a                                 | Involved in the study                              |
|-------------------------------------|----------------------------------------------------|
| <input checked="" type="checkbox"/> | <input type="checkbox"/> ChIP-seq                  |
| <input type="checkbox"/>            | <input checked="" type="checkbox"/> Flow cytometry |
| <input checked="" type="checkbox"/> | <input type="checkbox"/> MRI-based neuroimaging    |

## Antibodies

### Antibodies used

Antibodies from BD Biosciences: CD28 (Cat 555725, Clone 28.2, Lot 9317139), CD49d (cat 555501, clone 9F10, lot 0086602), CD107a-AF488 (Cat 567007, clone H4A3, lot B214155), CD4 (Cat 552838, clone L200, lot 9171956), CD3-AF700 (Cat 557917, clone SP34-2, lot 9277122), TNFa-BUV395 (Cat 563996, clone MAb11, lot 8043611), CD56-BV605 (cat 742659, clone MY31, lot 0170610), HLA-DR-BUV395 (Cat 564040, clone C45-5, lot 0009310).

Antibodies from Beckman Coulter: CD159a-PC7 (cat B10246, clone Z199, lot 200051)

Antibodies from BioLegend: CD8-APCFire750 (cat 344746, clone SK1, lot B268052), CD69-BV510 (cat 310936, clone FN50, lot B266846), CD20-PeDazzle-594 (cat 302348, clone L27, lot B280782), GD-TCR-BV421 (Cat 331218, clone B1, lot B277884), IFNg-PeCy7 (cat 506518, clone B27, lot B278688), GM-CSF-PE (cat 502306, clone BVD2-21C11, lot B298254), IL-17-BV711 (cat 512328, clone BL168, lot B266567), CD11c-PE (Cat 301605, clone 3.9, lot B256068), CD14-APC (cat 301808, clone M5E2, lot B259538), CD16-BV786 (cat 302046, clone VNK80, lot B254002)

Antibodies from Miltenyi: IL-2-APC (cat 130-091-644, clone N7.48 A, lot 5200503406)

### Validation

All monoclonal antibodies were titrated to determined optimal dilutions for the assay to achieve optimal signal to noise. Antibodies were used according to manufacturers instructions and validated by the manufacturer.

CD28  
<https://wwwbdbiosciences.com/ds/pm/tds/555725.pdf>  
 Manufacturer states cross-reactivity with cynomolgus and rhesus macaques



## CD56

<https://www.bdbiosciences.com/eu/tds/742659>

Previously used in macaques by Autissier et al 2010

<http://www.pubmedcentral.nih.gov/articlerender.fcgi?artid=2930593&tool=pmcentrez&rendertype=abstract>

## TNFa

<https://www.bdbiosciences.com/ds/pm/tds/563996.pdf>

Manufacturer states cross-reactivity with cynomolgus and rhesus macaques

## IFNg

<https://www.biolegend.com/en-us/global-elements/pdf-popup/pe-cyanine7-anti-human-ifn-gamma-antibody-5938?filename=PECyanine7%20anti-human%20IFN-gamma%20Antibody.pdf&pdfgen=true>

Manufacturer states cross-reactivity with cynomolgus and rhesus macaques

## CD3

<https://www.bdbiosciences.com/ds/pm/tds/557917.pdf>

Manufacturer states cross-reactivity with cynomolgus and rhesus macaques

## CD8

<https://www.biolegend.com/en-us/global-elements/pdf-popup/apc-fire-750-anti-human-cd8-antibody-13035?filename=APCFiretrade%20750%20anti-human%20CD8%20Antibody.pdf&pdfgen=true>

Manufacturer states cross-reactivity with cynomolgus and rhesus macaques

## CD4

<https://www.bdbiosciences.com/ds/pm/tds/552838.pdf>

Manufacturer states cross-reactivity with cynomolgus and rhesus macaques

## Eukaryotic cell lines

Policy information about [cell lines](#)

Cell line source(s)

Vero/hSLAM cells [ECACC 04091501], Vero/E6 cells [ECACC 85020206]

Authentication

Cell lines were obtained from the European Collection of Authenticated Cell Cultures (ECACC) PHE, Porton Down, UK. All stock sourced from ECACC has been manufactured according to established SOPs and quality control released following a set of established tests according ISO 17025, including

- Testing for bacteria and fungi
- Testing for mycoplasma
- Authentication testing: STR DNA profiling for human cell lines and DNA barcoding for non-human and human cell lines to confirm species.

Mycoplasma contamination

All cell lines used were confirmed negative for mycoplasma.

Commonly misidentified lines  
(See [ICLAC](#) register)

No commonly misidentified cells lines were used in this study.

## Animals and other organisms

Policy information about [studies involving animals](#); [ARRIVE guidelines](#) recommended for reporting animal research

Laboratory animals

Cynomolgus macaques (*Macaca fascicularis*), male and female; Rhesus macaques (*Macaca mulatta*), male and female. 2-4 years of age.

Wild animals

No wild animals were used during this study.

Field-collected samples

No field-collected samples were used during this study.

Ethics oversight

All experimental work was conducted under the authority of a UK Home Office approved project licence (PDC57C033) that had been subject to local ethical review at PHE Porton Down by the Animal Welfare and Ethical Review Body (AWERB) as required by the Home Office Animals (Scientific Procedures) Act 1986.

The study protocol was approved by ethical review at PHE Porton Down by the Animal Welfare and Ethical Review Body (AWERB).

Note that full information on the approval of the study protocol must also be provided in the manuscript.

## Plots

Confirm that:

- The axis labels state the marker and fluorochrome used (e.g. CD4-FITC).
- The axis scales are clearly visible. Include numbers along axes only for bottom left plot of group (a 'group' is an analysis of identical markers).
- All plots are contour plots with outliers or pseudocolor plots.
- A numerical value for number of cells or percentage (with statistics) is provided.

## Methodology

Sample preparation

PBMCs were isolated from whole blood anticoagulated with heparin (132 Units per 8 ml blood) (BD Biosciences, Oxford, UK) using standard methods. Of note is that the material used for density gradient centrifugation was adjusted dependent on the macaque species, with a Ficoll Histopaque gradient (GE Healthcare, USA) used with Rhesus macaque blood and a Percoll gradient (GE Healthcare) used with cynomolgus macaques. Mononuclear cells (MNC) were isolated from spleen and lung tissue samples using an OctoMACS tissue dissociation device (Miltenyi Biotec). Lung tissue samples were dissected into approximately 5mm<sup>3</sup> pieces and incubated for one hour in a solution of 772.8 U/ml collagenase + 426 U/ml DNase (both from Sigma) diluted in Earle's balanced salt solution supplemented with 200 mg/ml Calcium Chloride (Gibco, Life Technologies, Renfrew, UK), at 37°C with continual gentle mixing of the tube. The homogenised solution was passed through a 70 µm cell filter (BD Biosciences) and the mononuclear cells separated by Ficoll Histopaque density gradient centrifugation. PBMCs and MNC isolated from tissues were stored at -180 °C until resuscitated for analysis.

Instrument

BD LSRII Fortessa

Software

FlowJo V9.7.6, PESTLE V1.7, GraphPad Prism V8.01

Cell population abundance

A minimum of 100,000 lymphocytes were collected in the FSC/SSC gate for analysis.

Gating strategy

Cytokine producing T-cells were identified using a forward scatter-height (FSC-H) versus side scatter-area (SSC-A) dot plot to identify the lymphocyte population, to which appropriate gating strategies were applied to exclude doublet events, non-viable cells and B cells (CD20+). For ICS analysis, sequential gating through CD3+, followed by CD4+ or CD8+ gates were used before individual cytokine gates to identify IFN-γ, IL-2, TNF-α, GM-CSF and IL-17, CD107a and CD69 stained populations. In immunophenotyping data sets, classical-, non-classical-monocytes and monocyte derived dendritic cells (mDCs) were identified by FSC and SSC characteristics and by the expression pattern 808 of HLA-DR, CD14, CD16 and CD11c within the live CD3-, CD20- population. Similarly, natural killer cells subsets were identified by expression of CD8, CD159a, CD56 and CD16 within live CD3- lymphocyte subsets. Polyfunctional cells were identified using Boolean gating combinations of individual cytokine-producing CD4 or CD8 T-cells.

- Tick this box to confirm that a figure exemplifying the gating strategy is provided in the Supplementary Information.
